# Supplementary material
Source: Springer Nature journal article supplement (https://www.springermedizin.de/resource/supplementary/13099_2012_61_MOESM4_ESM.pdf/9665512)

| plasmid | I   |    | II  |    | I  |     | III | II  |     |     |    |    |
|---------|-----|----|-----|----|----|-----|-----|-----|-----|-----|----|----|
| ST      | 258 |    | 147 |    | 37 | 527 | 512 | 554 | 307 | 437 |    |    |
| year    | M   | 09 | 11  | 09 | 11 | 09  | 11  | 09  | 11  | 11  | 11 | 11 |

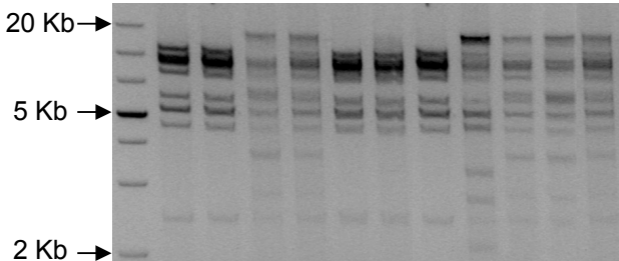

Supplement: MOESM4 [file 9665512]
